# Supplementary material for: Exposure to welding fumes is associated with hypomethylation of the F2RL3 gene: a cardiovascular disease marker
Source: PubMed Central journal article supplement — Occup Environ Med. 2015 Sep 22;72(12):845–51. doi: 10.1136/oemed-2015-102884 (PMC4680149; doi:10.1136/oemed-2015-102884), 2015-09-22
Supplement: oemed-2015-102884-s1.pdf [file oemed-2015-102884-s1.pdf]

Supplementary material

**Exposure to welding fumes is associated with hypomethylation of the *F2RL3* gene – a cardiovascular disease marker**

Mohammad B Hossain<sup>1</sup>, Huiqi Li<sup>1</sup>, Maria Hedmer<sup>1</sup>, Håkan Tinnerberg<sup>1</sup>, Maria Albin<sup>1</sup>, Karin Broberg<sup>1,2,\*</sup>

<sup>1</sup>Department of Laboratory Medicine, Division of Occupational and Environmental Medicine, Lund University, Lund, Sweden

<sup>2</sup>Institute of Environmental Medicine, Unit of Metals & Health, Karolinska Institutet, Stockholm, Sweden

\*Address correspondence to: Karin Broberg (Karin.Broberg@ki.se)

Supplementary Table 1. Primers used (denoted 5'-3') and sequences analyzed in the pyrosequencing assays.

|                                | Assay 1                                               | Assay 2                                                                                       |
|--------------------------------|-------------------------------------------------------|-----------------------------------------------------------------------------------------------|
| Forward primer                 | GTGGGGTTGTAGGTTAATGGGT                                | TGTTAATGATAGTGATATTT<br>TGGAGTTTT                                                             |
| Reverse primer                 | CCAACAACAACACTAAACC<br>ATACATAT                       | CCAACAACAACACTAAACCA<br>TACATATA                                                              |
| Sequencing primer              | GTTGGAGTTGTGGGTG                                      | GGGTTGGGTGTTTATTAG                                                                            |
| Sequence analysed <sup>a</sup> | TTGGTTAY*GT AGGTATTTYG<br>GTTGTTTTTT ATTATGTTGT TGATG | GTTGGTGTTY GTTTTTTATG<br>GGTTGGTTTT GGTGGTGGGG<br>TTGTYGGTTA ATGGGTTGGY<br>GTTGTGGGTG TTGGTTA |

<sup>a</sup>Y = C or T

\* corresponding to cg03636183
